# Supplementary material for: Human–Wildlife Conflicts: Does Origin Matter?
Source: MDPI journal article supplement (doi:10.3390/ani12202872), 2022-10-21
Supplement: s1 [file s1]

**Table S1.** List of species referred in APHIS tables.

| <b>Species</b>                       | <b>taxon</b> | <b>Native</b> |
|--------------------------------------|--------------|---------------|
| Starlings, European                  | Birds        | No            |
| Pigeons, Feral (Rock)                | Birds        | No            |
| Sparrows, House                      | Birds        | No            |
| Egrets, Cattle                       | Birds        | No            |
| Doves, Collared, Eurasian            | Birds        | No            |
| Finches, House                       | Birds        | No            |
| Ducks, Feral                         | Birds        | No            |
| Swans, Mute                          | Birds        | No            |
| Sparrows, House/English              | Birds        | No            |
| Mynas (All)                          | Birds        | No            |
| Chickens, Feral/Free Ranging         | Birds        | No            |
| Pheasants, Ring-Necked               | Birds        | No            |
| Doves, Zebra                         | Birds        | No            |
| Mannikins, Nutmeg                    | Birds        | No            |
| Doves, Spotted                       | Birds        | No            |
| Parakeets, Monk                      | Birds        | No            |
| Ducks, Feral Muscovy                 | Birds        | No            |
| Francolins, Black                    | Birds        | No            |
| Skylarks, Eurasian                   | Birds        | No            |
| Ducks, Muscovy                       | Birds        | No            |
| Cardinals, Red Crested               | Birds        | No            |
| Fowl, Pea                            | Birds        | No            |
| Mannikins, Chestnut                  | Birds        | No            |
| Avadavats, Red                       | Birds        | No            |
| Bulbuls, Red-Vented                  | Birds        | No            |
| Waxbills, Common                     | Birds        | No            |
| Finches, Saffron                     | Birds        | No            |
| White-Eyes, Japanese                 | Birds        | No            |
| Sparrows, Eurasian Tree              | Birds        | No            |
| Fowl, Guinea                         | Birds        | No            |
| Doves, Collared, Island (Philippine) | Birds        | No            |
| Fowl, Guinea, Feral Helmeted         | Birds        | No            |
| Sparrows, Java                       | Birds        | No            |
| Bulbuls, Red-Whiskered               | Birds        | No            |
| Silverbills, Warbling                | Birds        | No            |
| Drongos, Black                       | Birds        | No            |
| Francolins, Erckel's                 | Birds        | No            |
| Parakeets, Budgerigar                | Birds        | No            |
| Parrots, Feral Amazon                | Birds        | No            |
| Swans, Whooper                       | Birds        | No            |
| Waterfowl, Escaped/Hybrid/Exotic     | Birds        | No            |
| Geese, Canada                        | Birds        | Yes           |
| Vultures, Black                      | Birds        | Yes           |
| Vultures, Turkey                     | Birds        | Yes           |
| Hawks, Red-Tailed                    | Birds        | Yes           |
| Gulls, Herring                       | Birds        | Yes           |
| Ravens, Common                       | Birds        | Yes           |

|                                           |              |            |
|-------------------------------------------|--------------|------------|
| Gulls, Ring-Billed                        | Birds        | Yes        |
| Crows, American                           | Birds        | Yes        |
| Doves, Mourning                           | Birds        | Yes        |
| Hérons, Great Blue                        | Birds        | Yes        |
| Cormorants, Double-Crested                | Birds        | Yes        |
| Ducks, Mallard                            | Birds        | Yes        |
| Blackbirds, Red-Winged                    | Birds        | Yes        |
| Cranes, Sandhill                          | Birds        | Yes        |
| Grackles, Common                          | Birds        | Yes        |
| Turkeys, Wild                             | Birds        | Yes        |
| Woodpeckers, Downy                        | Birds        | Yes        |
| <b>Birds, unidentified</b>                | <b>Birds</b> | <b>Yes</b> |
| Killdeer                                  | Birds        | Yes        |
| Woodpeckers, Hairy                        | Birds        | Yes        |
| Swallows, Barn                            | Birds        | Yes        |
| Egrets, Great                             | Birds        | Yes        |
| Hawks, Cooper`s                           | Birds        | Yes        |
| Ospreys                                   | Birds        | Yes        |
| Meadowlarks, Eastern                      | Birds        | Yes        |
| Hawks, Harrier, Northern (Marsh<br>Hawks) | Birds        | Yes        |
| Owls, Great Horned                        | Birds        | Yes        |
| Blackbirds, (Mixed Species)               | Birds        | Yes        |
| Falcons, Kestrel, American                | Birds        | Yes        |
| Robins, American                          | Birds        | Yes        |
| Eagles, Bald                              | Birds        | Yes        |
| Gulls, Black-Backed, Great                | Birds        | Yes        |
| Cowbirds, Brown-Headed                    | Birds        | Yes        |
| Hawks, Red-Shouldered                     | Birds        | Yes        |
| Falcons, American Kestrels                | Birds        | Yes        |
| Swallows, Cliff                           | Birds        | Yes        |
| Blackbirds, Yellow-Headed                 | Birds        | Yes        |
| Flickers, Northern                        | Birds        | Yes        |
| Gulls, Laughing                           | Birds        | Yes        |
| Coots, American                           | Birds        | Yes        |
| Meadowlarks, Western                      | Birds        | Yes        |
| Egrets, Snowy                             | Birds        | Yes        |
| Hawks, Sharp-Shinned                      | Birds        | Yes        |
| Larks, Horned                             | Birds        | Yes        |
| Owls, Snowy                               | Birds        | Yes        |
| Ducks, Teal, Blue-Winged                  | Birds        | Yes        |
| Pelicans, American White                  | Birds        | Yes        |
| Sandpipers, Upland                        | Birds        | Yes        |
| Pocket Gophers, (Other)                   | Birds        | Yes        |
| Falcons, Peregrine                        | Birds        | Yes        |
| Grackles, Great-Tailed                    | Birds        | Yes        |
| Ducks, Teal, Green-Winged                 | Birds        | Yes        |
| Owls, Common Barn                         | Birds        | Yes        |

|                                 |       |     |
|---------------------------------|-------|-----|
| Ducks, American Black           | Birds | Yes |
| Ducks, Whistling, Black-Bellied | Birds | Yes |
| Chipmunks, Eastern              | Birds | Yes |
| Gulls, Franklin's               | Birds | Yes |
| Ducks, Shoveler, Northern       | Birds | Yes |
| Mockingbirds, Northern          | Birds | Yes |
| Ducks, Ring-Necked              | Birds | Yes |
| Cardinals, Northern             | Birds | Yes |
| Hawks, Swainson's               | Birds | Yes |
| Kingfishers, Belted             | Birds | Yes |
| Hérons, Night, Black-Crowned    | Birds | Yes |
| Eagles, Golden                  | Birds | Yes |
| Pocket Gophers, Botta's         | Birds | Yes |
| Owls, Barred                    | Birds | Yes |
| Blackbirds, Brewer's            | Birds | Yes |
| Hérons, Green                   | Birds | Yes |
| Ducks, Gadwall                  | Birds | Yes |
| Woodpeckers, Pileated           | Birds | Yes |
| Ibises, White                   | Birds | Yes |
| Geese, Snow, Lesser             | Birds | Yes |
| Jays, Blue                      | Birds | Yes |
| Owls, Short-Eared               | Birds | Yes |
| Caracaras, Northern Crested     | Birds | Yes |
| Hawks, Rough-Legged             | Birds | Yes |
| Gulls, California               | Birds | Yes |
| Ducks, Wigeon, American         | Birds | Yes |
| Swallows, Tree                  | Birds | Yes |
| Doves, White-Winged             | Birds | Yes |
| Fishers                         | Birds | Yes |
| Grebes, Pied-Billed             | Birds | Yes |
| Buntings, Snow                  | Birds | Yes |
| Gulls, Bonaparte's              | Birds | Yes |
| Sparrows, Savannah              | Birds | Yes |
| Ducks, Scaup, Lesser            | Birds | Yes |
| Gulls, Western                  | Birds | Yes |
| Ducks, Wood                     | Birds | Yes |
| Ducks, Pintail, Northern        | Birds | Yes |
| Hérons, Little Blue             | Birds | Yes |
| Ducks, Bufflehead               | Birds | Yes |
| Kites, Mississippi              | Birds | Yes |
| Ducks, Goldeneye, Common        | Birds | Yes |
| Yellowlegs, Greater             | Birds | Yes |
| Plovers, Golden, Pacific        | Birds | Yes |
| Ducks, Canvasback               | Birds | Yes |
| Woodpeckers, Red-Headed         | Birds | Yes |
| Sandpipers, Least               | Birds | Yes |
| Terns, Caspian                  | Birds | Yes |
| Ducks, Merganser Common         | Birds | Yes |

|                                    |       |     |
|------------------------------------|-------|-----|
| Terns, Least                       | Birds | Yes |
| Pelicans, Brown                    | Birds | Yes |
| Ducks, Redhead                     | Birds | Yes |
| Ducks, Merganser, Hooded           | Birds | Yes |
| Hérons, Night, Yellow-Crowned      | Birds | Yes |
| Magpies, Black-Billed              | Birds | Yes |
| Sandpipers, Semipalmated           | Birds | Yes |
| Ducks, Mottled                     | Birds | Yes |
| Hérons, Tricolored                 | Birds | Yes |
| Skimmers, Black                    | Birds | Yes |
| Woodpeckers, Red-Bellied           | Birds | Yes |
| Cormorants, Neotropic (Olivaceous) | Birds | Yes |
| Ducks, Merganser, Red-Breasted     | Birds | Yes |
| Ducks, Teal, Cinnamon              | Birds | Yes |
| Plovers, Black-Bellied             | Birds | Yes |
| Hawks, Broad-Winged                | Birds | Yes |
| Yellowlegs, Lesser                 | Birds | Yes |
| Flycatchers, Scissor-Tailed        | Birds | Yes |
| Ducks, Whistling, Fulvous          | Birds | Yes |
| Swifts (unadentify)                | Birds | Yes |
| Geese, Brant, Atlantic             | Birds | Yes |
| Plovers, Semipalmated              | Birds | Yes |
| Terns, Forster`s                   | Birds | Yes |
| Kingbirds, Western                 | Birds | Yes |
| Sanderlings                        | Birds | Yes |
| Kingbirds, Eastern                 | Birds | Yes |
| Waxwings, Cedar                    | Birds | Yes |
| Roadrunners                        | Birds | Yes |
| Whimbrels                          | Birds | Yes |
| Anhingas                           | Birds | Yes |
| Curlews, Long-Billed               | Birds | Yes |
| Storks, Wood                       | Birds | Yes |
| Geese, White-Fronted, Greater      | Birds | Yes |
| Geese, Snow, Greater               | Birds | Yes |
| Sandpipers, Buff-Breasted          | Birds | Yes |
| Ringtails                          | Birds | Yes |
| Snipes, Wilson`s                   | Birds | Yes |
| Dowitchers, Long-Billed            | Birds | Yes |
| Ducks, Ruddy                       | Birds | Yes |
| Swallows, Bank                     | Birds | Yes |
| Woodpeckers, Golden-Fronted        | Birds | Yes |
| Crows, Fish                        | Birds | Yes |
| Quail, Northern Bobwhite           | Birds | Yes |
| Pocket Gophers, Northern           | Birds | Yes |
| Bitterns, Yellow                   | Birds | Yes |
| Owls, Burrowing                    | Birds | Yes |
| Owls, Eastern Screech              | Birds | Yes |
| Swifts, Chimney                    | Birds | Yes |

|                                         |       |     |
|-----------------------------------------|-------|-----|
| Caracaras                               | Birds | Yes |
| Martins, Purple                         | Birds | Yes |
| Pocket Gophers, Plains                  | Birds | Yes |
| Pocket Gophers, Yellow-Faced            | Birds | Yes |
| Catbirds, Gray                          | Birds | Yes |
| Willetts                                | Birds | Yes |
| Falcons, Merlin                         | Birds | Yes |
| Juncos, Dark-Eyed                       | Birds | Yes |
| Nighthawks (All)                        | Birds | Yes |
| Ducks, Northern Pintail                 | Birds | Yes |
| Stilts, Black-Necked                    | Birds | Yes |
| Albatrosses, Laysan                     | Birds | Yes |
| Terns, Common                           | Birds | Yes |
| Turnstones, Ruddy                       | Birds | Yes |
| Sandpipers, Pectoral                    | Birds | Yes |
| Sandpipers, Solitary                    | Birds | Yes |
| Woodpeckers, Sapsuckers, Yellow-Bellied | Birds | Yes |
| Shrikes, Loggerhead                     | Birds | Yes |
| Nighthawks, Common                      | Birds | Yes |
| Grackles, Boat-Tailed                   | Birds | Yes |
| Pipits, American                        | Birds | Yes |
| Bitterns, American                      | Birds | Yes |
| Bobolinks                               | Birds | Yes |
| Frigatebirds, Greater                   | Birds | Yes |
| Ducks, Hawaiian (T/E)                   | Birds | Yes |
| Wrens, House                            | Birds | Yes |
| Loons, Common                           | Birds | Yes |
| Nuthatches, White-Breasted              | Birds | Yes |
| Falcons, Prairie                        | Birds | Yes |
| Owls, Long-Eared                        | Birds | Yes |
| Blackbirds, Rusty                       | Birds | Yes |
| Finches, Purple                         | Birds | Yes |
| Geese, Cackling                         | Birds | Yes |
| Sparrows, Field                         | Birds | Yes |
| Woodcock, American                      | Birds | Yes |
| Gulls, Glaucous-Winged                  | Birds | Yes |
| Ibises, Glossy                          | Birds | Yes |
| Ducks, Scaup, Greater                   | Birds | Yes |
| Warblers, Yellow-Rumped                 | Birds | Yes |
| Hawks, Goshawk, Northern                | Birds | Yes |
| Chickadee, Black-Capped                 | Birds | Yes |
| Quail (Other)                           | Birds | Yes |
| Ducks, Northern Shoveler                | Birds | Yes |
| Sparrows, White-Throated                | Birds | Yes |
| Quail, Gambel's                         | Birds | Yes |
| Dowitchers, Short-Billed                | Birds | Yes |
| Ducks, Eider, Common                    | Birds | Yes |

|                                 |       |     |
|---------------------------------|-------|-----|
| Hawks, Ferruginous              | Birds | Yes |
| Sparrows, Lincoln`s             | Birds | Yes |
| Phoebes, Eastern                | Birds | Yes |
| Longspurs, Lapland              | Birds | Yes |
| Plovers, Golden, American       | Birds | Yes |
| Swans, Tundra                   | Birds | Yes |
| Sparrows, Fox                   | Birds | Yes |
| Swallows, Northern Rough-Winged | Birds | Yes |
| Thrushes, Hermit                | Birds | Yes |
| Dickcissels                     | Birds | Yes |
| Swans, Trumpeter                | Birds | Yes |
| Dunlins                         | Birds | Yes |
| Hawks, Harris                   | Birds | Yes |
| Sparrows, Grasshopper           | Birds | Yes |
| Thrashers, Brown                | Birds | Yes |
| Thrushes, Wood                  | Birds | Yes |
| Gulls, Heermann`s               | Birds | Yes |
| Sparrows, Chipping              | Birds | Yes |
| Geese, Aleutian Cackling        | Birds | Yes |
| Pocket Gophers, Desert          | Birds | Yes |
| Ducks, Goldeneye, Barrow`s      | Birds | Yes |
| Grouse, Ruffed                  | Birds | Yes |
| Ibises, White-Faced             | Birds | Yes |
| Grebes, Western                 | Birds | Yes |
| Hummingbirds, Ruby-Throated     | Birds | Yes |
| Oystercatchers, American        | Birds | Yes |
| Wrens, Marsh                    | Birds | Yes |
| Grebes, Horned                  | Birds | Yes |
| Sparrows, American Tree         | Birds | Yes |
| Grosbeaks, Rose-Breasted        | Birds | Yes |
| Gulls, Black-Backed, Lesser     | Birds | Yes |
| Gulls, Glaucous                 | Birds | Yes |
| Ovenbirds                       | Birds | Yes |
| Phoebes, Say`s                  | Birds | Yes |
| Pocket Gophers, Western         | Birds | Yes |
| Sparrows, Vesper                | Birds | Yes |
| Bluebirds, Mountain             | Birds | Yes |
| Sandpipers, Spotted             | Birds | Yes |
| Terns, Royal                    | Birds | Yes |
| Longspurs, Smith`s              | Birds | Yes |
| Warblers, Wilsons               | Birds | Yes |
| Terns, Gull-Billed              | Birds | Yes |
| Wrens, Sedge                    | Birds | Yes |
| Sparrows, Lark                  | Birds | Yes |
| Warblers, Common, Yellowthroat  | Birds | Yes |
| Flycatchers, Pacific-Slope      | Birds | Yes |
| Geese, Hawaiian (T/E)           | Birds | Yes |
| Orioles, Northern               | Birds | Yes |

|                            |       |     |
|----------------------------|-------|-----|
| Pocket Gophers, Texas      | Birds | Yes |
| Sandpipers, Western        | Birds | Yes |
| Terns, Black               | Birds | Yes |
| Blackbirds, Tri-Colored    | Birds | Yes |
| Buntings, Lark             | Birds | Yes |
| Geese, Ross`s              | Birds | Yes |
| Thrushes, Swainson`s       | Birds | Yes |
| Vireos, Warbling           | Birds | Yes |
| Gnatcatchers, Blue-Gray    | Birds | Yes |
| Gulls, Mew                 | Birds | Yes |
| Stilts, Hawaiian (T/E)     | Birds | Yes |
| Swallows, Violet-Green     | Birds | Yes |
| Terns, Roseate (T/E)       | Birds | Yes |
| Titmouse, Tufted           | Birds | Yes |
| Warblers, Yellow           | Birds | Yes |
| Swallows, Cave             | Birds | Yes |
| Warblers, Orange-Crowned   | Birds | Yes |
| Bluebirds, Western         | Birds | Yes |
| Gulls, Iceland             | Birds | Yes |
| Orioles, Baltimore         | Birds | Yes |
| Partridge, Gray            | Birds | Yes |
| Sandpipers, Common         | Birds | Yes |
| Shrikes (Other)            | Birds | Yes |
| Sparrows, Golden-Crowned   | Birds | Yes |
| Swifts, White-Throated     | Birds | Yes |
| Thrashers, Curve-Billed    | Birds | Yes |
| Vireos, Red-Eyed           | Birds | Yes |
| Boobys, Brown              | Birds | Yes |
| Cranes, Whooping           | Birds | Yes |
| Dippers, American          | Birds | Yes |
| Geese, Brant, Black        | Birds | Yes |
| Grebes, Eared              | Birds | Yes |
| Hawks, Zone Tailed         | Birds | Yes |
| Jays, Steller`s            | Birds | Yes |
| Owls, Northern Saw-Whet    | Birds | Yes |
| Pigeons, Band-Tailed       | Birds | Yes |
| Sandpipers, Baird`s        | Birds | Yes |
| Tanager, Scarlet           | Birds | Yes |
| Tanagers, Western          | Birds | Yes |
| Woodpeckers, Ladder-Backed | Birds | Yes |
| Grosbeaks, Black-Headed    | Birds | Yes |
| Kites, Swallow-Tailed      | Birds | Yes |
| Loons, Red-Throated        | Birds | Yes |
| Pocket Gophers, Baird`s    | Birds | Yes |
| Sparrows, Black-Chinned    | Birds | Yes |
| Spoonbills, Roseate        | Birds | Yes |
| Warblers, Hermit           | Birds | Yes |
| Hawks, White-Tailed        | Birds | Yes |

|                                     |       |     |
|-------------------------------------|-------|-----|
| Loons, Pacific                      | Birds | Yes |
| Sandpipers, Stilt                   | Birds | Yes |
| Shearwaters (Other)                 | Birds | Yes |
| Sparrows, Brewer`s                  | Birds | Yes |
| Geese, White-Fronted, Lesser        | Birds | Yes |
| Owls, Western Screech               | Birds | Yes |
| Sandpipers, Wood                    | Birds | Yes |
| Shearwaters, Wedge-Tailed           | Birds | Yes |
| Terns, Common Fairy                 | Birds | Yes |
| Woodpeckers, Red-Cockaded (T/E)     | Birds | Yes |
| Coots, Hawaiian (T/E)               | Birds | Yes |
| Curlews, Bristle-Thighed            | Birds | Yes |
| Ducks, Scoter, White-Winged         | Birds | Yes |
| Flycatcher, Ash-Throated            | Birds | Yes |
| Grouse, Sharp-Tailed                | Birds | Yes |
| Hawks, Hawaiian (T/E)               | Birds | Yes |
| Hérons, Reef, Pacific               | Birds | Yes |
| Hummingbirds, Anna`s                | Birds | Yes |
| Jays, Scrub                         | Birds | Yes |
| Kinglet, Ruby-Crowned               | Birds | Yes |
| Kites, White-Tailed                 | Birds | Yes |
| Nighthawks, Lesser                  | Birds | Yes |
| Nuthatches, Red-Breasted            | Birds | Yes |
| Orioles, Bullock`s                  | Birds | Yes |
| Petrels, Hawaiian Dark-Rumped (T/E) | Birds | Yes |
| Poorwill, Common                    | Birds | Yes |
| Redpolls, Common                    | Birds | Yes |
| Sparrows, Black-Throated            | Birds | Yes |
| Tattlers, Wandering                 | Birds | Yes |
| Thrushes, Varied                    | Birds | Yes |
| Woodpeckers, Sapsuckers, Red-Naped  | Birds | Yes |
| Buntings, Indigo                    | Birds | Yes |
| Grebes, Eared (Black-Necked)        | Birds | Yes |
| Jays, Scrub, California             | Birds | Yes |
| Nuthatches, Pygmy                   | Birds | Yes |
| Orioles, Hooded                     | Birds | Yes |
| Owls, Great Gray                    | Birds | Yes |
| Pocket Gophers, Knox Jone`s         | Birds | Yes |
| Towhees, Canyon                     | Birds | Yes |
| Warblers,Townsend`s                 | Birds | Yes |
| Wrens, Cactus                       | Birds | Yes |
| Chukars                             | Birds | Yes |
| Cormorants, Pelagic                 | Birds | Yes |
| Crawfish, Red Swamp                 | Birds | Yes |
| Ducks, Scoter, Surf                 | Birds | Yes |
| Geese, Emperor                      | Birds | Yes |
| Godwits, Marbled                    | Birds | Yes |
| Gulls, Thayer`s                     | Birds | Yes |



|                                  |       |     |
|----------------------------------|-------|-----|
| Hummingbirds, Black-Chinned      | Birds | Yes |
| Hummingbirds, Rufous             | Birds | Yes |
| Jaegers, Long-Tailed             | Birds | Yes |
| Moorhens, Common                 | Birds | Yes |
| Nightjars, Whippoorwill, Eastern | Birds | Yes |
| Phalaropes, Red                  | Birds | Yes |
| Phalaropes, Red-Necked           | Birds | Yes |
| Phoebes, Black                   | Birds | Yes |
| Pikeminnows, Northern            | Birds | Yes |
| Plovers, Mountain                | Birds | Yes |
| Plovers, Snowy                   | Birds | Yes |
| Plovers, Western Snowy           | Birds | Yes |
| Quail, California                | Birds | Yes |
| Rails, Virginia                  | Birds | Yes |
| Siskins, Pine                    | Birds | Yes |
| Sora                             | Birds | Yes |
| Terns, Whiskered                 | Birds | Yes |
| Towhees, Spotted                 | Birds | Yes |
| Turnstones, Black                | Birds | Yes |
| Warblers, Blackpoll              | Birds | Yes |
| Warblers, Black-Throated Gray    | Birds | Yes |
| Warblers, Nashville              | Birds | Yes |
| Buntings, Lazuli                 | Birds | Yes |
| Chipmunks, Least                 | Birds | Yes |
| Cormorants, Brandts              | Birds | Yes |
| Crossbills, White-Winged         | Birds | Yes |
| Doves, Ground, Common            | Birds | Yes |
| Doves, Inca                      | Birds | Yes |
| Ducks, Scoter, Black             | Birds | Yes |
| Finches, Gray Crowned Rosy       | Birds | Yes |
| Goldfinches, Lawrence`s          | Birds | Yes |
| Goldfinches, Lesser              | Birds | Yes |
| Grebes, Clarks                   | Birds | Yes |
| Grosbeaks, Evening               | Birds | Yes |
| Grouse, Sage, Greater            | Birds | Yes |
| Hummingbirds, Costa`s            | Birds | Yes |
| Jays, Gray                       | Birds | Yes |
| Kinglets, Golden-Crowned         | Birds | Yes |
| Owls, Northern Pygmy             | Birds | Yes |
| Pocket Gophers, Attwater`s       | Birds | Yes |
| Pocket Gophers, Camas            | Birds | Yes |
| Pocket Gophers, Townsend`s       | Birds | Yes |
| Snipes, Common                   | Birds | Yes |
| Sparrows, Sage                   | Birds | Yes |
| Towhees, Green-Tailed            | Birds | Yes |
| Verdins                          | Birds | Yes |
| Woodpeckers, Lewis`s             | Birds | Yes |
| Wrens, Canyon                    | Birds | Yes |

|                                        |                |            |
|----------------------------------------|----------------|------------|
| Swine, Feral                           | Mammals        | No         |
| Dogs, Feral, Free-Ranging And Hybrids  | Mammals        | No         |
| Cats, Feral/Free Ranging               | Mammals        | No         |
| Nutrias                                | Mammals        | No         |
| Rats, Norway                           | Mammals        | No         |
| Rats, Black (Roof)                     | Mammals        | No         |
| Bats, Common Vampire                   | Mammals        | No         |
| Mice, House                            | Mammals        | No         |
| Rabbits, Feral                         | Mammals        | No         |
| Cattle, Feral                          | Mammals        | No         |
| Antelope, Nilgai                       | Mammals        | No         |
| Deer, Fallow                           | Mammals        | No         |
| Horses, Feral                          | Mammals        | No         |
| Sheep, Feral, Free-Ranging And Exotics | Mammals        | No         |
| Deer, Sambar (Philippine)              | Mammals        | No         |
| Mongoose, Indian                       | Mammals        | No         |
| Burros, Feral                          | Mammals        | No         |
| Ferrets, European                      | Mammals        | No         |
| Deer, Axis                             | Mammals        | No         |
| Rats, Polynesian                       | Mammals        | No         |
| Goats, Mountain                        | Mammals        | No         |
| Coyotes                                | Mammals        | Yes        |
| Raccoons                               | Mammals        | Yes        |
| Skunks, Striped                        | Mammals        | Yes        |
| Beavers                                | Mammals        | Yes        |
| Bears, Black                           | Mammals        | Yes        |
| Deer, White-Tailed (Wild)              | Mammals        | Yes        |
| Foxes, Red                             | Mammals        | Yes        |
| Opossums, Virginia                     | Mammals        | Yes        |
| Lions, Mountain (Cougar)               | Mammals        | Yes        |
| Wolves, Gray/Timber                    | Mammals        | Yes        |
| Woodchucks                             | Mammals        | Yes        |
| Bobcats                                | Mammals        | Yes        |
| Foxes, Gray                            | Mammals        | Yes        |
| Squirrels, Eastern Gray                | Mammals        | Yes        |
| Bears, Grizzly                         | Mammals        | Yes        |
| Prairie Dogs, Gunnison's               | Mammals        | Yes        |
| Marmots/Woodchucks (All)               | Mammals        | Yes        |
| Prairie Dogs, Black-Tailed             | Mammals        | Yes        |
| <b>Bats (unidentified)</b>             | <b>Mammals</b> | <b>Yes</b> |
| Muskrats                               | Mammals        | Yes        |
| Bears, Louisiana Black                 | Mammals        | Yes        |
| Badgers                                | Mammals        | Yes        |
| Bats, Brown, Big                       | Mammals        | Yes        |
| Wolves, Mexican Gray                   | Mammals        | Yes        |
| Squirrels, Ground, California          | Mammals        | Yes        |
| Peccaries, Collared (Javelina)         | Mammals        | Yes        |
| Porcupines                             | Mammals        | Yes        |

|                                          |                |            |
|------------------------------------------|----------------|------------|
| Otters, River                            | Mammals        | Yes        |
| Squirrels, Rock                          | Mammals        | Yes        |
| Armadillos, Nine-Banded                  | Mammals        | Yes        |
| Squirrels, Fox                           | Mammals        | Yes        |
| <b>Mammal, unidentified</b>              | <b>Mammals</b> | <b>Yes</b> |
| Rabbits, Cottontails, Desert             | Mammals        | Yes        |
| Rabbits, Cottontails, Eastern            | Mammals        | Yes        |
| Rabbits, Cottontail                      | Mammals        | Yes        |
| Bats, Brown, Little                      | Mammals        | Yes        |
| Hares, Jackrabbits, Black-Tailed         | Mammals        | Yes        |
| Squirrels, Ground (Other)                | Mammals        | Yes        |
| Deer, Mule                               | Mammals        | Yes        |
| Skunks, Hooded                           | Mammals        | Yes        |
| Minks                                    | Mammals        | Yes        |
| Moles (unadentified)                     | Mammals        | Yes        |
| Elk, Wapiti (Wild)                       | Mammals        | Yes        |
| Squirrels, Western Gray                  | Mammals        | Yes        |
| Bats, Brazilian (Mexican) Free-Tailed    | Mammals        | Yes        |
| Marmots, Yellow-Bellied                  | Mammals        | Yes        |
| Mice, Deer (unadentified)                | Mammals        | Yes        |
| Deer, Black-Tailed                       | Mammals        | Yes        |
| Skunks, Spotted                          | Mammals        | Yes        |
| Voles (Other)                            | Mammals        | Yes        |
| Squirrels, Flying (All)                  | Mammals        | Yes        |
| Skunks, Hog-Nosed                        | Mammals        | Yes        |
| Squirrels, Abert's                       | Mammals        | Yes        |
| Squirrels, Ground, Thirteen-Lined        | Mammals        | Yes        |
| Squirrels, Ground, Round-Tailed          | Mammals        | Yes        |
| Mice, Deer, White-Footed                 | Mammals        | Yes        |
| Weasels (Other)                          | Mammals        | Yes        |
| Weasels, Long-Tailed                     | Mammals        | Yes        |
| Bats, Hoary                              | Mammals        | Yes        |
| Shrews (unadentified)                    | Mammals        | Yes        |
| Bats, Silver-Haired                      | Mammals        | Yes        |
| Woodrats, White-Throated                 | Mammals        | Yes        |
| Mice, Deer, North American               | Mammals        | Yes        |
| Pronghorns (Antelope)                    | Mammals        | Yes        |
| Bats, Cave Myotis                        | Mammals        | Yes        |
| Squirrels, Ground, Belding's             | Mammals        | Yes        |
| Squirrels, Ground, Richardson's          | Mammals        | Yes        |
| Moose                                    | Mammals        | Yes        |
| Bats, Pipistrelles, Western (Canyon Bat) | Mammals        | Yes        |
| Mice, Pocket, Arizona                    | Mammals        | Yes        |
| Shrews, Short-Tailed                     | Mammals        | Yes        |
| Rats, Kangaroo (unadentified)            | Mammals        | Yes        |
| Bats, Lesser Long-Nosed                  | Mammals        | Yes        |
| Coatis                                   | Mammals        | Yes        |
| Bats, Big Free Tail                      | Mammals        | Yes        |

|                                         |         |     |
|-----------------------------------------|---------|-----|
| Moles, Eastern                          | Mammals | Yes |
| Prairie Dogs, White-Tailed              | Mammals | Yes |
| Squirrels, Flying, Northern             | Mammals | Yes |
| Hares, Jackrabbits, White-Tailed        | Mammals | Yes |
| Weasels, Short Tailed                   | Mammals | Yes |
| Shrews, Least                           | Mammals | Yes |
| Shrews, Masked                          | Mammals | Yes |
| Deer, Red                               | Mammals | Yes |
| Rabbits, Cottontails, Mountain          | Mammals | Yes |
| Squirrels, Flying, Southern             | Mammals | Yes |
| Bats, California Myotis                 | Mammals | Yes |
| Woodrats, Bushy-Tailed                  | Mammals | Yes |
| Foxes, Swift                            | Mammals | Yes |
| Squirrels, Douglas                      | Mammals | Yes |
| Woodrats, Dusky Footed                  | Mammals | Yes |
| Squirrels, Ground, Mexican              | Mammals | Yes |
| Bats, Pallid                            | Mammals | Yes |
| Skunks, Western Spotted                 | Mammals | Yes |
| Squirrels, Ground, Golden-Mantled       | Mammals | Yes |
| Voles, Prairie                          | Mammals | Yes |
| Rats, Kangaroo, Ord's                   | Mammals | Yes |
| Rabbits, Cottontails, New England       | Mammals | Yes |
| Rats, Kangaroo, Merriam's               | Mammals | Yes |
| Squirrels, Ground, Columbian            | Mammals | Yes |
| Squirrels, Ground, Wyoming              | Mammals | Yes |
| Woodrats, Eastern                       | Mammals | Yes |
| Bats, Western Yellow                    | Mammals | Yes |
| Hares, Snowshoe                         | Mammals | Yes |
| Chipmunks (Other)                       | Mammals | Yes |
| Chipmunks, Cliff                        | Mammals | Yes |
| Bison (Buffalo)                         | Mammals | Yes |
| Deer, Sika                              | Mammals | Yes |
| Beavers, Mountain                       | Mammals | Yes |
| Mice, Deer, Cactus                      | Mammals | Yes |
| Squirrels, Ground, Uinta                | Mammals | Yes |
| Bats, Bonneted, Greatr (Westrn Mastiff) | Mammals | Yes |
| Bats, Western Red                       | Mammals | Yes |
| Woodrats, Southern Plains               | Mammals | Yes |
| Bats, Fringed Myotis                    | Mammals | Yes |
| Foxes, Channel Island Gray              | Mammals | Yes |
| Rats, Hutia                             | Mammals | Yes |
| Sheep, Bighorn                          | Mammals | Yes |
| Weasels, Least                          | Mammals | Yes |
| Bats, Yuma Myotis                       | Mammals | Yes |
| Lynx                                    | Mammals | Yes |
| Sea Lions, Steller                      | Mammals | Yes |
| Wolves, Red                             | Mammals | Yes |
| Woodrats, Desert                        | Mammals | Yes |

|                                        |          |     |
|----------------------------------------|----------|-----|
| Bats, Arizona Myotis                   | Mammals  | Yes |
| Bats, Long-Eared Myotis                | Mammals  | Yes |
| Foxes, Kit, San Joaquin (T/E)          | Mammals  | Yes |
| Martens, Pine                          | Mammals  | Yes |
| Rabbits, Cottontails, Swamp            | Mammals  | Yes |
| Sea Lions, California                  | Mammals  | Yes |
| Bats, Small-Footed Myotis              | Mammals  | Yes |
| Shrews, Pygmy                          | Mammals  | Yes |
| Shrews, Short-Tailed, Northern         | Mammals  | Yes |
| Shrews, Short-Tailed, Southern         | Mammals  | Yes |
| Woodrats, Allegheny                    | Mammals  | Yes |
| Bats, Big-Eared, Townsend`s            | Mammals  | Yes |
| Bats, Long-Tongued Mexican             | Mammals  | Yes |
| Bats, Pocketed Free-Tailed             | Mammals  | Yes |
| Caribou/Reindeer                       | Mammals  | Yes |
| Muskrats, Round-Tailed                 | Mammals  | Yes |
| Rabbits, Cottontails, Appalachian      | Mammals  | Yes |
| Rabbits, Cottontails, Brush Non-T/E    | Mammals  | Yes |
| Squirrels, Antelope, Harris`s          | Mammals  | Yes |
| Snakes, Brown Tree                     | Reptiles | No  |
| Reptiles, Exotic                       | Reptiles | No  |
| Iguanas, Green                         | Reptiles | No  |
| Lizards, Monitor                       | Reptiles | No  |
| Pythons, Burmese                       | Reptiles | No  |
| Snakes, Non-Venomous (Other)           | Reptiles | Yes |
| Snakes, Venomous (Other)               | Reptiles | Yes |
| Snakes, Rattlesnakes, Western Diamond  | Reptiles | Yes |
| Turtles, Common Snapping               | Reptiles | Yes |
| Snakes, Gopher                         | Reptiles | Yes |
| Turtles (Other)                        | Reptiles | Yes |
| Snakes, Garter (All)                   | Reptiles | Yes |
| Lizards, (Other)                       | Reptiles | Yes |
| Snakes, Rattlesnakes, Black Tailed     | Reptiles | Yes |
| Alligators, American                   | Reptiles | Yes |
| Snakes, Rattlesnakes, Mohave           | Reptiles | Yes |
| Snakes, Rattlesnakes, Western          | Reptiles | Yes |
| Turtles, Slider                        | Reptiles | Yes |
| Turtles, Painted                       | Reptiles | Yes |
| Salamanders (All)                      | Reptiles | Yes |
| Snakes, Bull                           | Reptiles | Yes |
| Snakes, Rattlesnakes, Prairie          | Reptiles | Yes |
| Snakes, Rattlesnakes, Southern Pacific | Reptiles | Yes |
| Turtles, Common Map                    | Reptiles | Yes |
| Snakes, Coach Whip                     | Reptiles | Yes |
| Snakes, Common King                    | Reptiles | Yes |
| Snakes, Cottonmouth                    | Reptiles | Yes |
| Turtles, Red-Eared Slider              | Reptiles | Yes |
| Snakes, Rattlesnakes, Red Diamond      | Reptiles | Yes |

|                                     |            |     |
|-------------------------------------|------------|-----|
| Lizards, Gila Monster               | Reptiles   | Yes |
| Snakes, Rat, Western (Texas, Black) | Reptiles   | Yes |
| Iguanas, Black Spiny-Tailed         | Reptiles   | Yes |
| Snakes, Sonoran Whipsnake           | Reptiles   | Yes |
| Turtles, Eastern Box                | Reptiles   | Yes |
| Turtles, Spiny Softshell            | Reptiles   | Yes |
| Snakes, Ring-Necked                 | Reptiles   | Yes |
| Frogs/Toads (Other)                 | amphibians | Yes |
| Frogs, American Bullfrog            | amphibians | Yes |
